# Supplementary material for: Changes in the Physicochemical Quality Characteristics of Cabbage Kimchi with respect to Storage Conditions
Source: Hindawi journal article supplement (doi:10.1155/2017/9562981), 2017-01-01
Supplement: f1 [file 9562981.f1.docx]

**Storage time (week)**

**(A)**

**(B)**

FIGURE S1: Changes in the content of various organic acids (mg/kg) over 8 weeks storage at 4 °C (A) and 10 °C (B).
